# Supplementary material for: Gene Losses and Plastome Degradation in the Hemiparasitic Species Plicosepalus acaciae and Plicosepalus curviflorus: Comparative Analyses and Phylogenetic Relationships among Santalales Members
Source: MDPI journal article supplement (doi:10.3390/plants11141869), 2022-07-18
Supplement: s1 [file s1]

**Table S1:** Genes present in the plastome of *P. acaciae*.

| Category           | Group of genes                        | Name of genes                                                                                                                                                                                                                                                                                                                                                                                                 |
|--------------------|---------------------------------------|---------------------------------------------------------------------------------------------------------------------------------------------------------------------------------------------------------------------------------------------------------------------------------------------------------------------------------------------------------------------------------------------------------------|
| RNA genes          | Ribosomal RNA genes (rRNA)            | rrn4.5S <sup>a</sup> , rrn16S <sup>a</sup> , rrn5S <sup>a</sup> , rrn23S <sup>a</sup>                                                                                                                                                                                                                                                                                                                         |
|                    | Transfer RNA genes (tRNA)             | trnR-UCU, trnC-GCA, trnT-GGU, trnG-GCC, trnS-GGA, trnF-GAA, trnM-CAU <sup>a</sup> , trnV-GAC <sup>a</sup> , trnR-ACG <sup>a</sup> , trnL-UAG, trnN-GUU <sup>a</sup> , trnL-CAA <sup>a</sup> , trnH-GUG <sup>a</sup> , trnP-UGG <sup>a</sup> , trnW-CCA <sup>a</sup> , trnT-UGU, trnS-UGA, trnE-UUC, trnY-GUA, trnD-GUC, trnS-GCU, trnQ-UUG, trnA-UGC, trnI-CAU, trnL-UAA <sup>+</sup> , trnI-GAU <sup>+</sup> |
| Ribosomal proteins | Small subunit of ribosome             | rps11, rps12a <sup>+</sup> , rps14, rps15, rps18, rps19, rps2, rps3, rps4, rps7 <sup>a</sup> , rps8, rps18                                                                                                                                                                                                                                                                                                    |
| Transcription      | Large subunit of ribosome             | rpl14, rpl16, rpl2 <sup>+</sup> , rpl20, rpl22, rpl23 <sup>a</sup> , rpl36                                                                                                                                                                                                                                                                                                                                    |
|                    | DNA dependent RNA polymerase          | rpoA, rpoB, rpoC2, rpoC1 <sup>+</sup>                                                                                                                                                                                                                                                                                                                                                                         |
| Protein genes      | Photosystem I                         | psaA, psaB, psaC, psaI, psaJ                                                                                                                                                                                                                                                                                                                                                                                  |
|                    | Photosystem II                        | psbA, psbB, psbC, psbD, psbE, psbF, psbH, psbI, psbJ, psbK, psbM, psbT, psbZ, psbN                                                                                                                                                                                                                                                                                                                            |
|                    | Subunit of cytochrome                 | petA, petB <sup>+</sup> , petD, petG, petL, petN                                                                                                                                                                                                                                                                                                                                                              |
|                    | Subunit of synthase                   | atpA, atpB, atpE, atpF <sup>+</sup> , atpH, atpI                                                                                                                                                                                                                                                                                                                                                              |
|                    | Large subunit of RUBISCO              | rbcl                                                                                                                                                                                                                                                                                                                                                                                                          |
|                    | Chloroplast envelope membrane protein | cemA                                                                                                                                                                                                                                                                                                                                                                                                          |
| Other genes        | Maturase                              | matK                                                                                                                                                                                                                                                                                                                                                                                                          |
|                    | Subunit acetyl-coA carboxylase        | accD                                                                                                                                                                                                                                                                                                                                                                                                          |
|                    | C-type cytochrome synthesis           | ccsA                                                                                                                                                                                                                                                                                                                                                                                                          |
|                    | Hypothetical proteins                 | ycf2, ycf15 <sup>a</sup> , ycf3 <sup>++</sup> , ycf4                                                                                                                                                                                                                                                                                                                                                          |
|                    | Component of TIC complex              | ycf1 <sup>a</sup>                                                                                                                                                                                                                                                                                                                                                                                             |
|                    | Protease                              | clpP <sup>++</sup>                                                                                                                                                                                                                                                                                                                                                                                            |

+ Gene with one intron, ++ Gene with two intron and <sup>a</sup> Gene with copies

**Table S2:** Genes present in the plastome of *P. curviflorus*.

| Category           | Group of genes                        | Name of genes                                                                                                                                                                                                                                                                                                                                             |
|--------------------|---------------------------------------|-----------------------------------------------------------------------------------------------------------------------------------------------------------------------------------------------------------------------------------------------------------------------------------------------------------------------------------------------------------|
| RNA genes          | Ribosomal RNA genes (rRNA)            | rrn4.5 <sup>a</sup> , rrn16 <sup>a</sup> , rrn5 <sup>a</sup> , rrn23 <sup>a</sup>                                                                                                                                                                                                                                                                         |
|                    | Transfer RNA genes (tRNA)             | trnR-UCU, trnC-GCA, trnT-GGU, trnG-GCC, trnS-GGA, trnF-GAA, trnM-CAU <sup>a</sup> , trnV-GAC <sup>a</sup> , trnR-ACG <sup>a</sup> , trnL-UAG, trnN-GUU <sup>a</sup> , trnL-CAA <sup>a</sup> , trnH-GUG, trnP-UGG, trnW-CCA, trnT-UGU, trnS-UGA, trnE-UUC, trnY-GUA, trnD-GUC, trnS-GCU, trnQ-UUG, trnL-UAA, trnI-CAU <sup>a</sup> , trnA-UGC <sup>a</sup> |
| Ribosomal proteins | Small subunit of ribosome             | rps11, rps12 <sup>++a</sup> , rps14, rps15, rps18, rps19, rps2, rps3, rps4, rps7 <sup>a</sup> , rps8                                                                                                                                                                                                                                                      |
| Transcription      | Large subunit of ribosome             | rpl14, rpl16 <sup>+</sup> , rpl2 <sup>+</sup> , rpl20, rpl22, rpl23 <sup>a</sup> , rpl36                                                                                                                                                                                                                                                                  |
|                    | DNA dependent RNA polymerase          | rpoA, rpoB, rpoC1 <sup>+</sup> , rpoC2                                                                                                                                                                                                                                                                                                                    |
| Protein genes      | Photosystem I                         | psaA, psaB, psaC, psaI, psaJ, ycf3 <sup>++</sup> , ycf4                                                                                                                                                                                                                                                                                                   |
|                    | Photosystem II                        | psbA, psbB, psbC, psbD, psbE, psbF, psbH, psbI, psbJ, psbK, psbN, psbM, psbT, psbZ                                                                                                                                                                                                                                                                        |
|                    | Subunit of cytochrome                 | petA, petB <sup>+</sup> , petG, petL, petN                                                                                                                                                                                                                                                                                                                |
|                    | Subunit of synthase                   | atpA, atpB, atpE, atpF <sup>+</sup> , atpH, atpI                                                                                                                                                                                                                                                                                                          |
|                    | Large subunit of RUBISCO              | rbcl                                                                                                                                                                                                                                                                                                                                                      |
|                    | ATP dependent protease subunit P      | clpP1 <sup>++</sup>                                                                                                                                                                                                                                                                                                                                       |
|                    | Chloroplast envelope membrane protein | cemA                                                                                                                                                                                                                                                                                                                                                      |
| Other genes        | Maturase                              | matK                                                                                                                                                                                                                                                                                                                                                      |
|                    | Subunit acetyl-coA carboxylase        | accD                                                                                                                                                                                                                                                                                                                                                      |
|                    | C-type cytochrome synthesis           | ccsA                                                                                                                                                                                                                                                                                                                                                      |
|                    | Hypothetical proteins                 | ycf2 <sup>a</sup> , ycf3 <sup>++</sup> , ycf4, ycf15 <sup>a</sup>                                                                                                                                                                                                                                                                                         |
|                    | Component of TIC complex              | ycf1                                                                                                                                                                                                                                                                                                                                                      |

+ Gene with one intron, ++ Gene with two intron and <sup>a</sup> Gene with copies

**Table S3:** Codon-anticodon recognition patterns and codon usage in the *P. acacia* chloroplast genome.

| Codon | Amino acid | RSCU | tRNA     | Codon | Amino acid | RSCU | tRNA     |
|-------|------------|------|----------|-------|------------|------|----------|
| UUU   | Phe        | 0.76 | trnF-GAA | UAU   | Tyr        | 0.55 | trnY-GUA |
| UUC   | Phe        | 1.24 |          | UAC   | Tyr        | 1.45 |          |
| UUA   | Leu        | 1.41 | trnL-UAA | UAA   | Stop       | 0    |          |
| UUG   | Leu        | 1.24 | trnL-CAA | UAG   | Stop       | 0    |          |
| CUU   | Leu        | 0.62 | trnL-UAG | CAU   | His        | 2    | trnH-GUG |
| CUC   | Leu        | 1.06 |          | CAC   | His        | 0    |          |
| CUA   | Leu        | 0.79 |          | CAA   | Gln        | 0.81 | trnQ-UUG |
| CUG   | Leu        | 0.88 |          | CAG   | Gln        | 1.19 |          |
| AUU   | Ile        | 0.91 |          | AAU   | Asn        | 1.47 | trnN-GUU |
| AUC   | Ile        | 1.18 |          | AAC   | Asn        | 0.53 |          |
| AUA   | Ile        | 0.91 | trnI-CAU | AAA   | Lys        | 1.11 |          |
| AUG   | Met        | 1    | trnM-CAU | AAG   | Lys        | 0.89 |          |
| GUU   | Val        | 1.21 | trnV-GAC | GAU   | Asp        | 1.26 | trnD-GUC |
| GUC   | Val        | 0.89 |          | GAC   | Asp        | 0.74 |          |
| GUA   | Val        | 1    |          | GAA   | Glu        | 0.5  | trnE-UUC |
| GUG   | Val        | 0.89 |          | GAG   | Glu        | 1.5  |          |
| UCU   | Ser        | 0.68 | trnS-GGA | UGU   | Cys        | 1.57 | trnC-GCA |
| UCC   | Ser        | 1.91 |          | UGC   | Cys        | 0.43 |          |
| UCA   | Ser        | 0.82 |          | UGA   | Stop       | 0    |          |
| UCG   | Ser        | 1.02 | trnS-UGA | UGG   | Trp        | 1    | trnW-CCA |
| CCU   | Pro        | 1.33 | trnP-UGG | CGU   | Arg        | 0.97 | trnR-ACG |
| CCC   | Pro        | 1.33 |          | CGC   | Arg        | 1.24 | trnR-UCU |
| CCA   | Pro        | 0.72 |          | CGA   | Arg        | 0.79 |          |
| CCG   | Pro        | 0.62 |          | CGG   | Arg        | 1.15 |          |
| ACU   | Thr        | 1.58 |          | AGA   | Arg        | 0.53 |          |
| ACC   | Thr        | 0.97 |          | AGG   | Arg        | 1.32 |          |
| ACA   | Thr        | 0.61 | trnT-GGU | AGU   | Ser        | 0.55 | trnS-GCU |
| ACG   | Thr        | 0.85 | trnT-UGU | AGC   | Ser        | 1.02 |          |
| GCU   | Ala        | 1.07 | trnA-UGC | GGU   | Gly        | 1    |          |
| GCC   | Ala        | 1.07 |          | GGC   | Gly        | 1    | trnG-GCC |
| GCA   | Ala        | 0.67 |          | GGA   | Gly        | 0.56 |          |
| GCG   | Ala        | 1.2  |          | GGG   | Gly        | 1.44 |          |

**Table S4:** Codon-anticodon recognition patterns and codon usage in the *P. curviflorus* chloroplast genome.

| Codon | Amino acid | RSCU | tRNA     | Codon | Amino acid | RSCU | tRNA     |
|-------|------------|------|----------|-------|------------|------|----------|
| UUU   | Phe        | 0.62 | trnF-GAA | UAU   | Tyr        | 1    | trnY-GUA |
| UUC   | Phe        | 1.38 |          | UAC   | Tyr        | 1    |          |
| UUA   | Leu        | 1.63 | trnL-UAA | UAA   | Stop       | 0    |          |
| UUG   | Leu        | 1.11 | trnL-CAA | UAG   | Stop       | 0    |          |
| CUU   | Leu        | 0.43 | trnL-UAG | CAU   | His        | 1.71 | trnH-GUG |
| CUC   | Leu        | 1.2  |          | CAC   | His        | 0.29 |          |
| CUA   | Leu        | 0.86 |          | CAA   | Gln        | 0.75 | trnQ-UUG |
| CUG   | Leu        | 0.77 |          | CAG   | Gln        | 1.25 |          |
| AUU   | Ile        | 1.06 |          | AAU   | Asn        | 1.52 | trnN-GUU |
| AUC   | Ile        | 1.06 |          | AAC   | Asn        | 0.48 |          |
| AUA   | Ile        | 0.87 | trnI-CAU | AAA   | Lys        | 1.13 |          |
| AUG   | Met        | 1    | trnM-CAU | AAG   | Lys        | 0.87 |          |
| GUU   | Val        | 1.22 | trnV-GAC | GAU   | Asp        | 1.26 | trnD-GUC |
| GUC   | Val        | 0.87 |          | GAC   | Asp        | 0.74 |          |
| GUA   | Val        | 1.1  |          | GAA   | Glu        | 0.5  | trnE-UUC |
| GUG   | Val        | 0.81 |          | GAG   | Glu        | 1.5  |          |
| UCU   | Ser        | 0.75 | trnS-GGA | UGU   | Cys        | 1.67 | trnC-GCA |
| UCC   | Ser        | 2.17 |          | UGC   | Cys        | 0.33 |          |
| UCA   | Ser        | 0.9  |          | UGA   | Stop       | 0    |          |
| UCG   | Ser        | 0.9  | trnS-UGA | UGG   | Trp        | 1    | trnW-CCA |
| CCU   | Pro        | 1.37 | trnP-UGG | CGU   | Arg        | 0.92 | trnR-ACG |
| CCC   | Pro        | 1.37 |          | CGC   | Arg        | 1.23 | trnR-UCU |
| CCA   | Pro        | 0.84 |          | CGA   | Arg        | 0.92 |          |
| CCG   | Pro        | 0.42 |          | CGG   | Arg        | 1.08 |          |
| ACU   | Thr        | 1.58 |          | AGA   | Arg        | 0.62 |          |
| ACC   | Thr        | 0.97 |          | AGG   | Arg        | 1.23 |          |
| ACA   | Thr        | 0.85 | trnT-GGU | AGU   | Ser        | 0.52 | trnS-GCU |
| ACG   | Thr        | 0.61 | trnT-UGU | AGC   | Ser        | 0.75 |          |
| GCU   | Ala        | 1.29 | trnA-UGC | GGU   | Gly        | 1    |          |
| GCC   | Ala        | 1.16 |          | GGC   | Gly        | 1.11 | trnG-GCC |
| GCA   | Ala        | 0.65 |          | GGA   | Gly        | 0.61 |          |
| GCG   | Ala        | 0.9  |          | GGG   | Gly        | 1.28 |          |

**Table S5:** The predicted RNA editing sites in *P. acacia* chloroplast genome.

| Gene  | Nucleotide Position | Amino Acid Position | Codon Conversion | Amino Acid Conversion | Score | position |
|-------|---------------------|---------------------|------------------|-----------------------|-------|----------|
| atpA  | 773                 | 258                 | TCA=> TTA        | S=>L                  | 1     | 1        |
|       | 914                 | 305                 | TCA=> TTA        | S=>L                  | 1     | 1        |
| atpF  | 92                  | 31                  | CCA=> CTA        | P=>L                  | 0.86  | 1        |
| atpI  | 23                  | 8                   | ACC=> ATC        | T=>I                  | 1     | 1        |
|       | 35                  | 12                  | ACC=> ATC        | T=>I                  | 1     | 1        |
|       | 641                 | 214                 | TCA=> TTA        | S=>L                  | 1     | 1        |
| ccsA  | 137                 | 46                  | ACA=> ATA        | T=>I                  | 1     | 1        |
| matK  | 334                 | 112                 | CTT=> TTT        | L=>F                  | 0.86  | 1        |
|       | 658                 | 220                 | CAT=> TAT        | H=>Y                  | 1     | 1        |
|       | 926                 | 309                 | GCT=> GTT        | A=>V                  | 0.86  | 1        |
|       | 1144                | 382                 | CCA=> TCA        | P=>S                  | 0.86  | 1        |
|       | 1393                | 465                 | CCA=> TCA        | P=>S                  | 0.86  | 1        |
| petB  | 418                 | 140                 | CGG=> TGG        | R=>W                  | 1     | 1        |
|       | 611                 | 204                 | TCA=> TTA        | S=>L                  | 1     | 1        |
| psbB  | 305                 | 102                 | GCA=> GTA        | A=>V                  | 0.86  | 1        |
| rpl2  | 601                 | 201                 | CCG=> TCG        | P=>S                  | 1     | 1        |
| rpl20 | 308                 | 103                 | TCA=> TTA        | S=>L                  | 0.86  | 1        |
| rpoA  | 368                 | 123                 | TCG=> TTG        | S=>L                  | 1     | 1        |
|       | 751                 | 251                 | CTT=> TTT        | L=>F                  | 0.86  | 1        |
|       | 338                 | 113                 | TCT=> TTT        | S=>F                  | 1     | 1        |
|       | 473                 | 158                 | TCA=> TTA        | S=>L                  | 0.86  | 1        |
|       | 566                 | 189                 | TCG=> TTG        | S=>L                  | 1     | 1        |
|       | 898                 | 300                 | CTT=> TTT        | L=>F                  | 0.86  | 1        |
|       | 2342                | 781                 | ACA=> ATA        | T=>I                  | 1     | 1        |
|       | 2788                | 930                 | CTT=> TTT        | L=>F                  | 0.86  | 1        |
|       | 800                 | 267                 | GCC=> GTC        | A=>V                  | 0.86  | 1        |
|       | 1241                | 414                 | GCG=> GTG        | A=>V                  | 0.86  | 1        |
| rpoC2 | 2281                | 761                 | CGG=> TGG        | R=>W                  | 1     | 1        |
|       | 2800                | 934                 | CCT=> TCT        | P=>S                  | 1     | 1        |
|       | 248                 | 83                  | TCA=> TTA        | S=>L                  | 1     | 1        |
| rps8  | 182                 | 61                  | TCA=> TTA        | S=>L                  | 0.86  | 1        |
|       | 334                 | 112                 | CCG=> TCG        | P=>S                  | 1     | 1        |
| ycf3  | 233                 | 78                  | ACA=> ATA        | T=>I                  | 1     | 1        |

**Table S6:** The predicted RNA editing sites in *P. curviflorus* chloroplast genome.

| Gene  | Nucleotide Position | Amino Acid Position | Codon Conversion | Amino Acid Conversion | Score | Position |
|-------|---------------------|---------------------|------------------|-----------------------|-------|----------|
| atpA  | 773                 | 258                 | TCA=>TTA         | S=>L                  | 1     | 1        |
|       | 914                 | 305                 | TCA=>TTA         | S=>L                  | 1     | 1        |
|       | 1148                | 383                 | TCA=>TTA         | S=>L                  | 1     | 1        |
| atpF  | 92                  | 31                  | CCA=>CTA         | P=>L                  | 0.86  | 1        |
| atpI  | 23                  | 8                   | ACC=>ATC         | T=>I                  | 1     | 1        |
|       | 35                  | 12                  | ACC=>ATC         | T=>I                  | 1     | 1        |
|       | 641                 | 214                 | TCA=>TTA         | S=>L                  | 1     | 1        |
| ccsA  | 644                 | 215                 | GCG=>GTG         | A=>V                  | 0.86  | 1        |
|       | 43                  | 15                  | CTT=>TTT         | L=>F                  | 1     | 1        |
|       | 137                 | 46                  | ACA=>ATA         | T=>I                  | 1     | 1        |
| matK  | 322                 | 108                 | CTT=>TTT         | L=>F                  | 0.86  | 1        |
|       | 646                 | 216                 | CAT=>TAT         | H=>Y                  | 1     | 1        |
|       | 914                 | 305                 | GCT=>GTT         | A=>V                  | 0.86  | 1        |
| petB  | 1132                | 378                 | CCA=>TCA         | P=>S                  | 0.86  | 1        |
|       | 1381                | 461                 | CCA=>TCA         | P=>S                  | 0.86  | 1        |
|       | 418                 | 140                 | CGG=>TGG         | R=>W                  | 1     | 1        |
| psbB  | 611                 | 204                 | TCA =>TTA        | S =>L                 | 1     | 1        |
|       | 305                 | 102                 | GCA=>GTA         | A=>V                  | 0.86  | 1        |
|       | 308                 | 103                 | TCA=>TTA         | S =>L                 | 0.86  | 1        |
| rpl20 | 368                 | 123                 | TCG=>TTG         | S =>L                 | 1     | 1        |
| rpoA  | 338                 | 113                 | TCT=>TTT         | S=>F                  | 1     | 1        |
|       | 473                 | 158                 | TCA=>TTA         | S=>L                  | 0.86  | 1        |
|       | 551                 | 184                 | TCA=>TTA         | S=>L                  | 1     | 1        |
| rpoB  | 566                 | 189                 | TCG=>TTG         | S=>L                  | 1     | 1        |
|       | 898                 | 300                 | CTT=>TTT         | L=>F                  | 0.86  | 1        |
|       | 2342                | 781                 | ACA=>ATA         | T=>I                  | 1     | 1        |
| rpoC1 | 2788                | 930                 | CTT=>TTT         | L=>F                  | 0.86  | 1        |
|       | 41                  | 14                  | TCG=>TTG         | S=>L                  | 1     | 1        |
|       | 296                 | 99                  | ACA=>ATA         | T=>I                  | 1     | 1        |
| rpoC2 | 815                 | 272                 | GCG=>GTG         | A=>V                  | 0.86  | 1        |
|       | 1256                | 419                 | GCG =>GTG        | A=>V                  | 0.86  | 1        |
|       | 2296                | 766                 | CGG=> TGG        | R=>W                  | 1     | 1        |
| rps2  | 2815                | 939                 | CCT => TCT       | P=>S                  | 1     | 1        |
|       | 3986                | 1329                | GCG => GTG       | A=>V                  | 0.86  | 1        |
|       | 4112                | 1371                | TCT=> TTT        | S=>F                  | 0.8   | 1        |
| rps8  | 248                 | 83                  | TCA =>TTA        | S=>L                  | 1     | 1        |
| rps14 | 182                 | 61                  | TCA =>TTA        | S=>L                  | 0.86  | 1        |
|       | 334                 | 112                 | CCG => TCG       | P=>S                  | 1     | 1        |
|       | 149                 | 50                  | CCA=>CTA         | P=>L                  | 1     | 1        |
| ycf3  | 233                 | 78                  | ACA=>ATA         | T=>I                  | 1     | 1        |

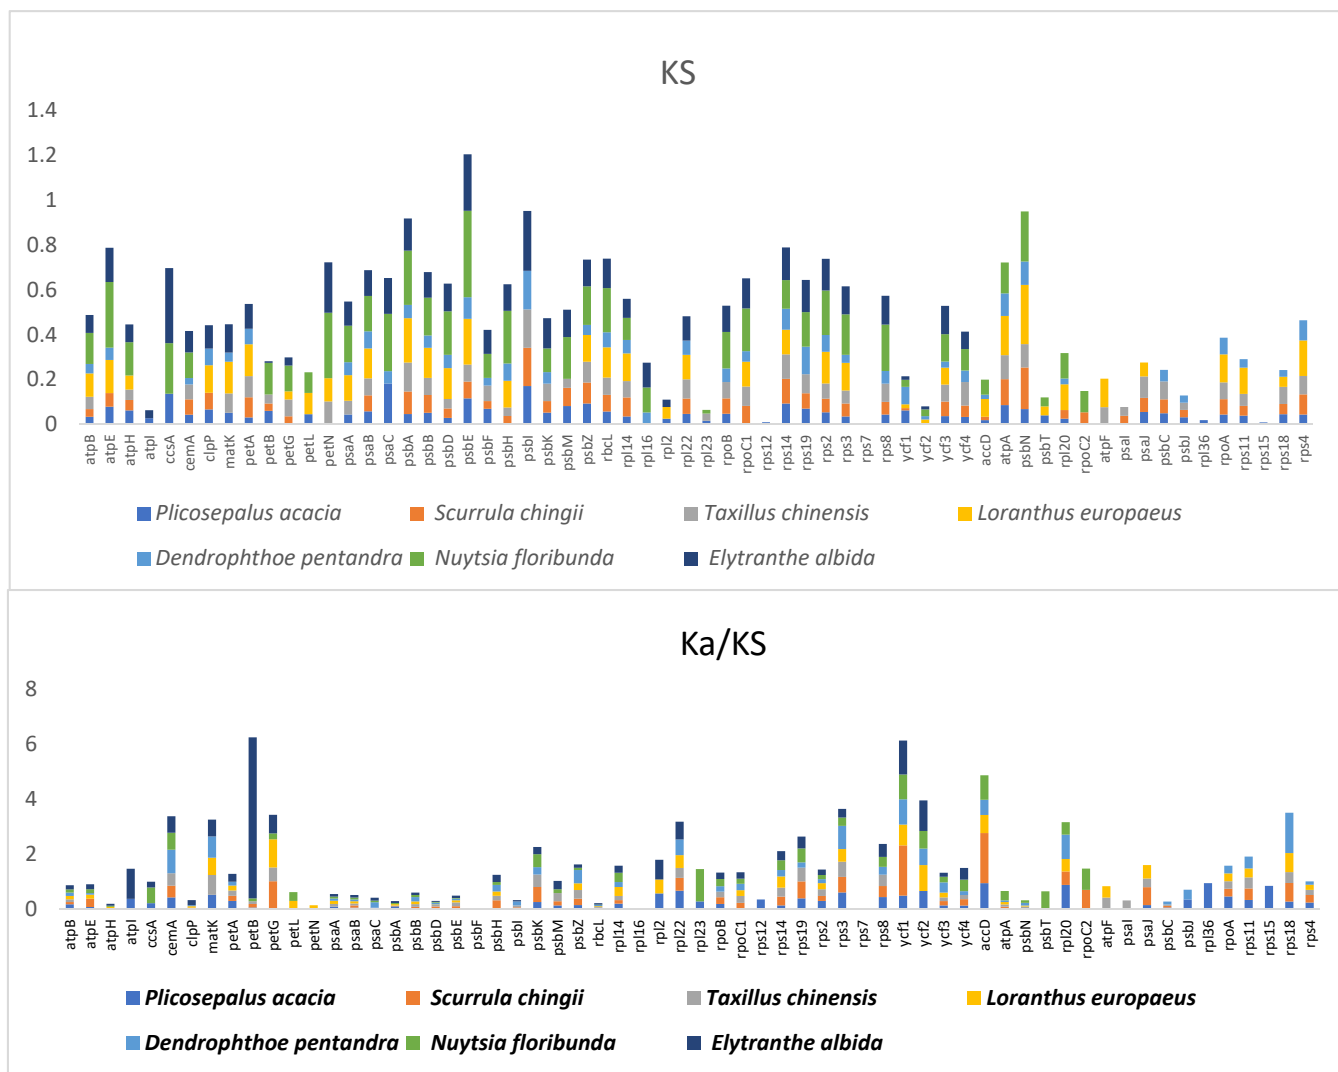

Figure S1: Synonymous (Ks) and Ka/Ks ratio values of 59 protein-coding genes of the *Plicosepalus curviflorus* vs. *Loranthaceae* plastomes (*Plicosepalus acacia*, *Scurrula chingii*, *Taxillus chinensis*, *Loranthus europaeus*, *Dendrophthoe pentandra*, *Nuytsia floribunda* and *Elytranthe*), using the KaKs Calculator 2.0 to detect substitution, selection, and beneficial mutation genes under selective pressure (>1).

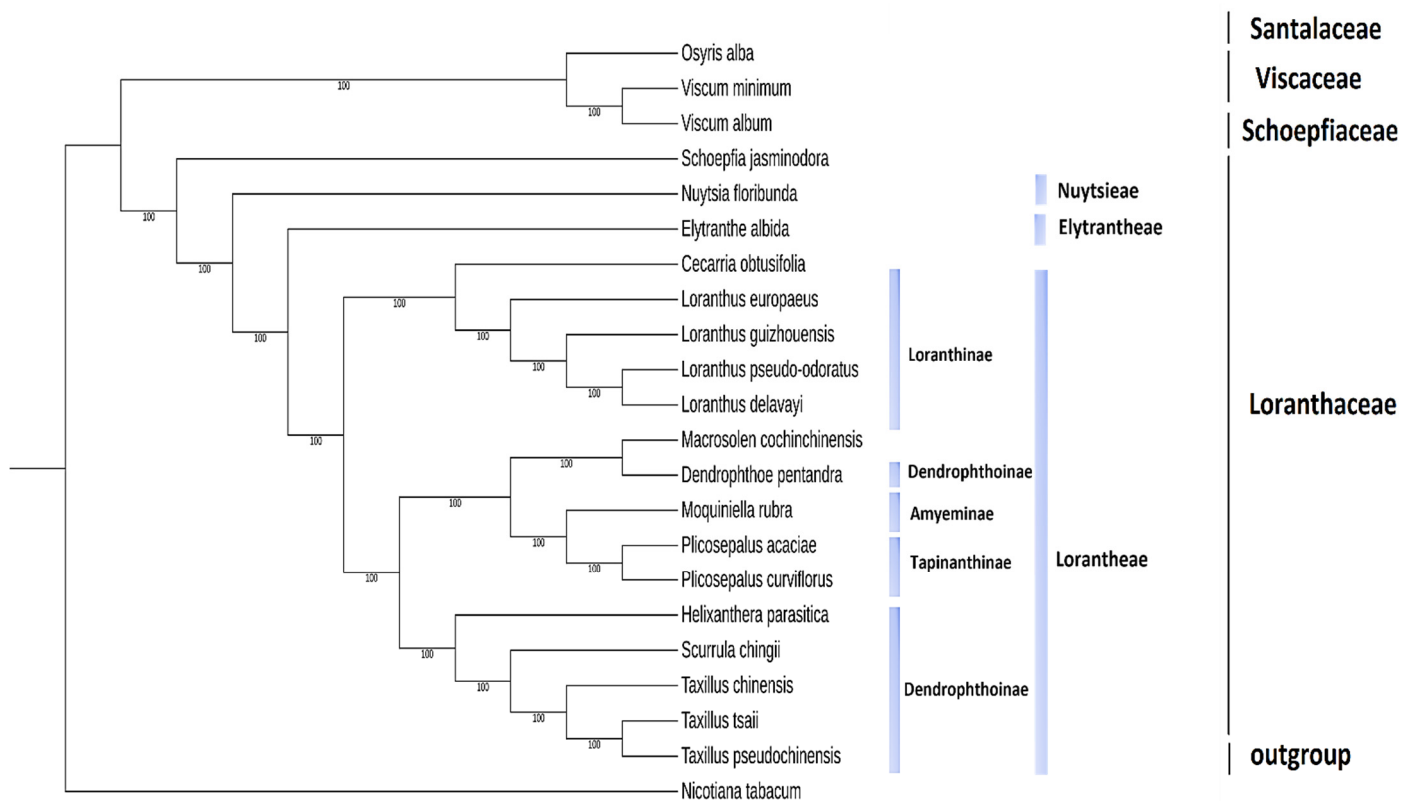

Figure S2: Phylogenetic tree construction inferred from the complete chloroplast genomes of 21 taxa, using Maximum Parsimony (MP) methods. The tree shows the relationships between Brassicales (Cleomaceae, Capparaceae and Brassicaceae). The numbers in the branch nodes represent bootstrap support (BP).
